# Supplementary material
Source: PubMed Central journal article supplement (PMC2568934)
Supplement: M802743200_1.pdf [file M802743200_1.pdf]

Supplemental Figure 1

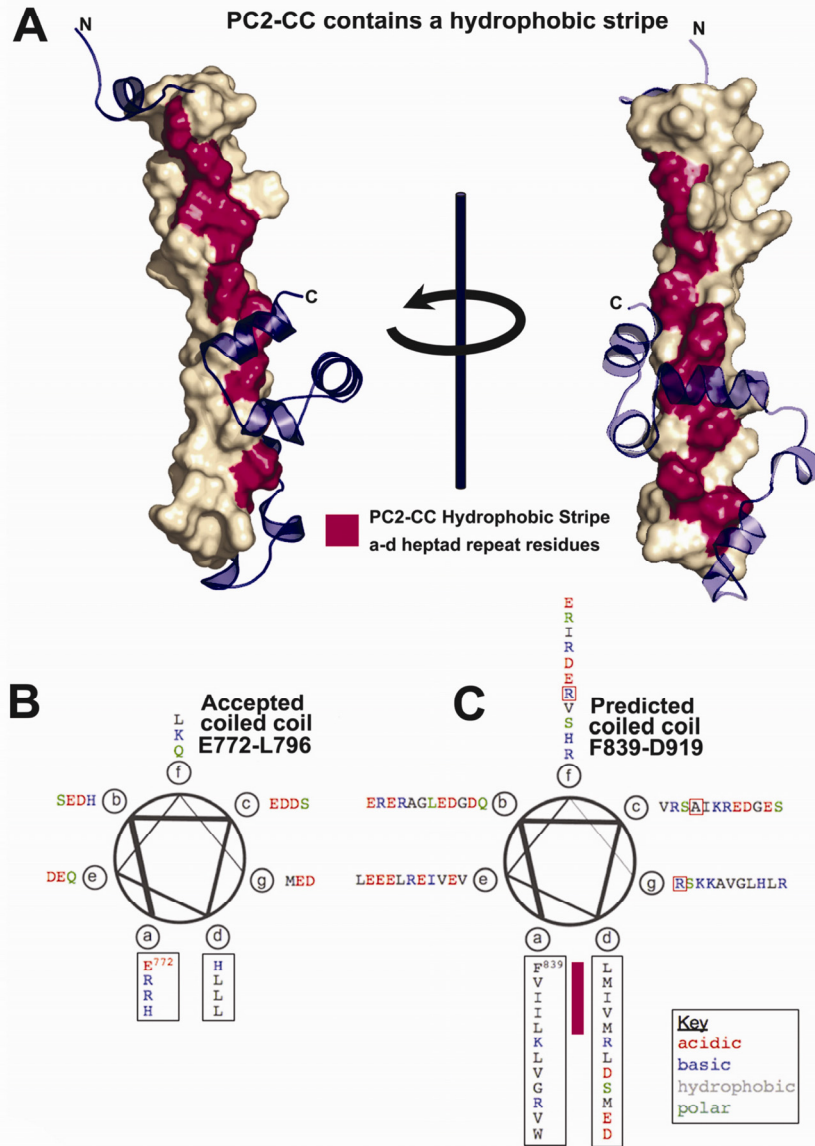

**Supplemental Figure 1: PC2 contains a novel coiled coil domain with a hydrophobic protein-protein interaction surface.** **A)** PC2-CC (G828-H927) is shown as cartoon and the central helix (F839-M870) depicted as surface. Heptad repeat 'a-d' residues predicted by MARCOIL are highlighted in pink. **B)** Helical wheel projection of PC2-C residues (E772-L796) previously reported to contain a coiled coil motif. Residues in the interface position 'a' and 'd' are hydrophilic or charged, making oligomerization at this site unfavorable. **C)** Helical wheel projection of PC2-C residues (F839-D919) proposed in this study to contain the coiled coil motif. Residues at the coiled coil interface 'a-d' are hydrophobic. The pink stripe corresponds to residues highlighted on the *de novo* model of PC2-CC and may serve as a PC2-C oligomerization or protein-protein interaction interface. PKD-associated truncations are boxed in red.

Supplemental Figure 2

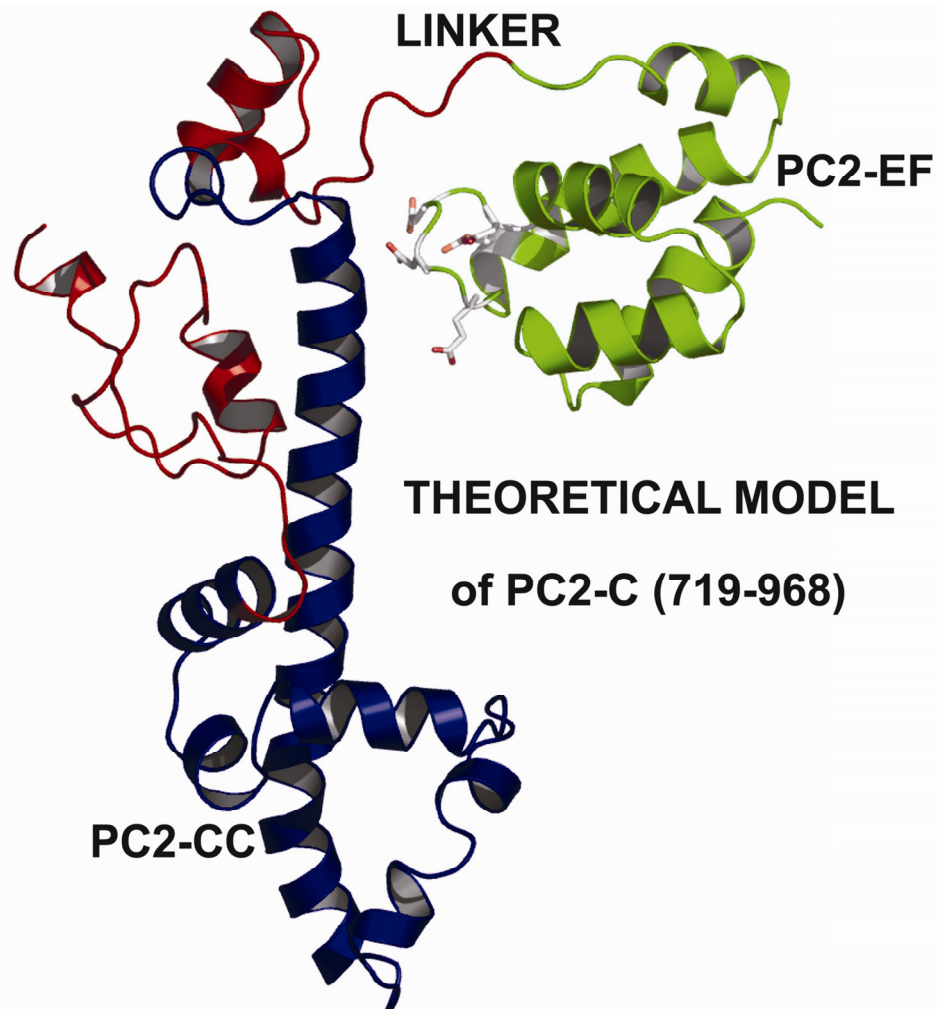

**Supplemental Figure 2. Theoretical model of PC2-C (719-968)**

ROBETTA models of PC2-C (703-968) and of PC2-EF (719-800) alone were analyzed to create a combined theoretical model of PC2-C. Coordinates for the ROBETTA model of PC2-EF (719-800) and coordinates of PC2-C (only residues 801-968) were combined and ligated using Swiss-PdbViewer followed by energy minimization. The combined model of PC2-C (719-968) was visualized using PYMOL. PC2-EF is shown in green and PC2-CC is shown in blue. Putative Ca<sup>2+</sup> binding residues are shown as sticks. Flexible segments identified by limited proteolysis are shown in red. N-terminal residues 704-710 are not shown and were not included in the final model. Coordinates for ROBETTA models of PC2-EF, PC2-C and the combined theoretical model of PC2-C have been included as supplemental data.

### Supplemental Figure 3

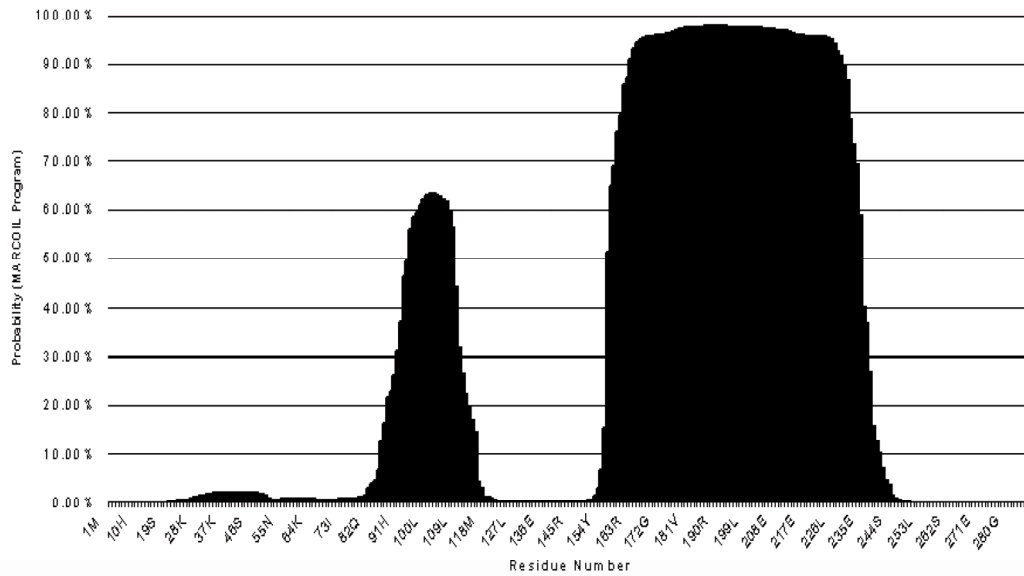

**Supplemental Figure 3: MARCOIL output for PC2-C (M703-V968) suggests PC2 contains a previously unreported coiled coil domain (F839-D919).** F839-D919 are predicted to have >90% propensity to form a coiled coil. Predicted coiled coil interface residues 'a' and 'd' are hydrophobic from F839-M870 and may serve as a oligomerization or protein-protein interaction interface. A shorter segment, Q776-D788, is predicted to have >50% propensity to form a coiled coil but the corresponding 'a' and 'd' interface residues are hydrophilic or charged.

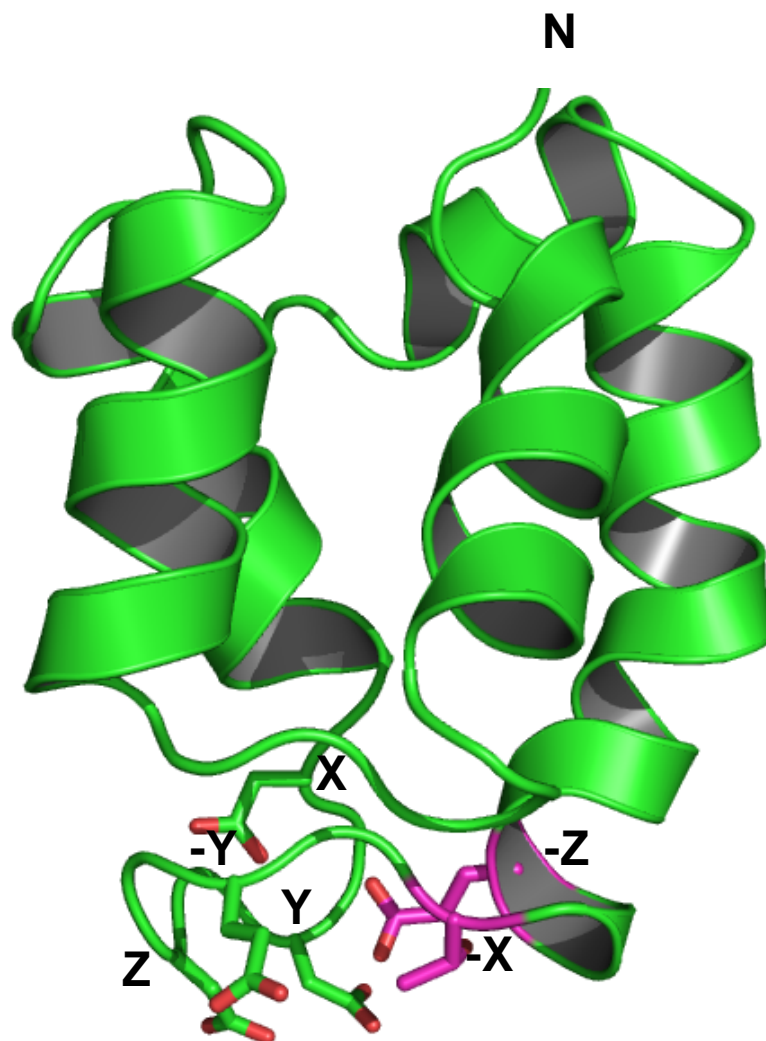

|          |      |      |      |      |      |      |      |      |       |      |      |       |
|----------|------|------|------|------|------|------|------|------|-------|------|------|-------|
| Position | 1    | 2    | 3    | 4    | 5    | 6    | 7    | 8    | 9     | 10   | 11   | 12    |
|          | X    |      | Y    |      | Z    |      | -Y   |      | -X    |      |      | -Z    |
| Residue  | D763 | Q764 | D765 | G766 | D767 | Q768 | E769 | L770 | T771  | E772 | H773 | E774  |
| Mutation |      |      |      |      |      |      |      |      | T771A |      |      | E774A |

**Supplemental Figure 4. ROBETTA model of PC2-EF highlighting residues predicted to form a calcium binding loop.** Residues in the  $-x$  position (T771) and  $-z$  position (E774), colored magenta, were mutated to alanine resulting in complete loss of calcium binding. PC2 residues predicted to form a canonical EF-hand calcium binding loop are listed in the above table.

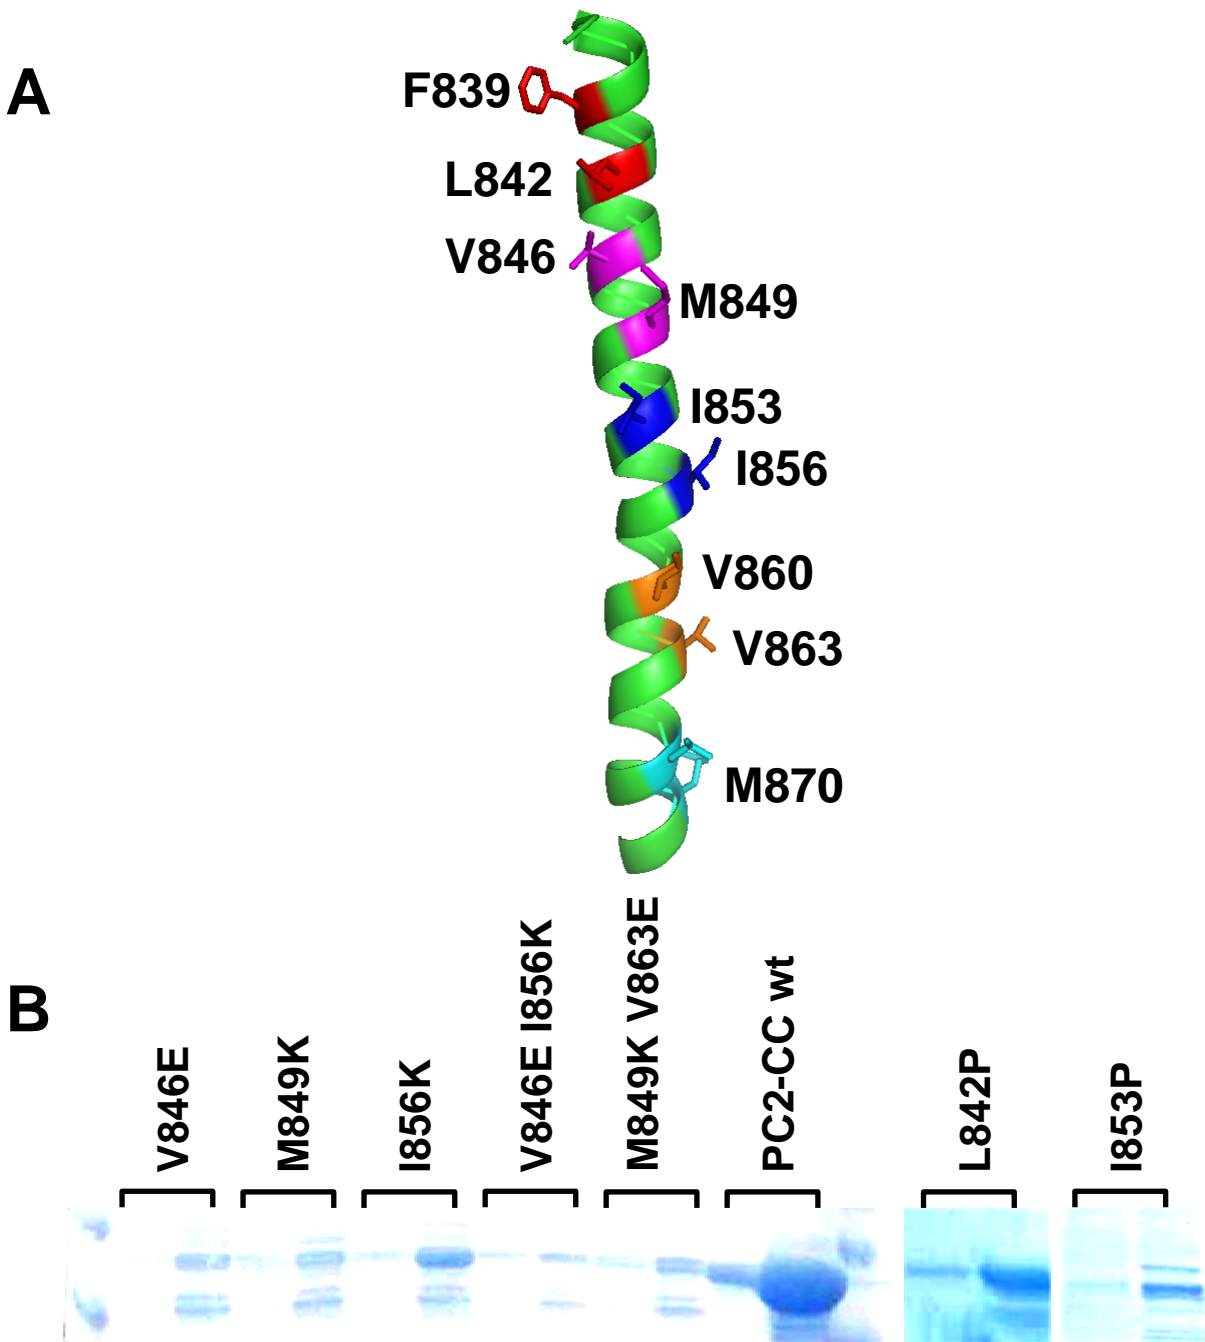

**Supplemental Figure 5. Site-directed mutagenesis of PC2-CC residues predicted to form the coiled coil oligomerization interface ('a-d' heptad repeat residues) to either a charged residue or proline induces non-specific aggregation and inclusion body formation upon recombinant expression in *E.coli*.** **A.** ROBETTA model of the predicted PC2 coiled coil region highlighting the locations of heptad repeat residues 'a' and 'd'. **B.** SDS-PAGE of elution fractions following HisTrap Nickel column purification of individual charge or proline mutations of PC2-CC. Mutant PC2-CC variants were grown and purified in parallel and compared with wildtype PC2-CC for expression level, solubility and final yield. Only I856K and L842P yielded any protein (~20-fold less) in the soluble fraction, but these mutants rapidly precipitated. (note: minor bands visible on SDS-PAGE for mutations other than I856K and L842P are bacterial impurities)
